# Developmental Variation in Nitrous Oxide–induced c-Fos Expression in Fischer Rat Spinal Cord

Toshikazu Hashimoto, M.D.,\* Yoko Ohashi, M.D.,\* Laura E. Nelson, B.A.,† Mervyn Maze, M.B., Ch.B., F.R.C.P., F.R.C.A.,‡ Masahiko Fujinaga, M.D.§

RECENT studies have further clarified the mechanism for the analgesic–antinociceptive action of nitrous oxide (N<sub>2</sub>O).<sup>1</sup> N<sub>2</sub>O induces opioid peptide release in the mid brain, which activates descending noradrenergic inhibitory neurons and modulates pain and nociceptive processing in the spinal cord. Activation of descending noradrenergic inhibitory neurons by N<sub>2</sub>O can be assessed by the induction of c-Fos expression (a protein product of the immediate early gene, *c-fos*, which is commonly used as an immunohistochemical marker of neuronal activation<sup>2</sup>) in the spinal cord in adult rats.<sup>3</sup> Because the descending noradrenergic inhibitory neurons are not yet functional at birth in rats,<sup>4,5</sup> we posit that N<sub>2</sub>O is not an effective analgesic–antinociceptive agent in newborns. In support of this, we have shown that N<sub>2</sub>O lacks antinociceptive effect in the tail flick test (thermal stimulation on the tail) in newborn rats.<sup>6</sup> In this report, we show that N<sub>2</sub>O administration does not induce c-Fos expression in the spinal cord of newborn rats, possibly due to a lack of functional descending noradrenergic inhibitory neurons.

## Materials and Methods

### Animal and Gas Exposure

The study protocol of animal experiments was approved by the Home Office of the United Kingdom (London, United Kingdom), and all efforts were made to minimize animal suffering and reduce the number of animals used. Fischer rats<sup>7</sup> of different ages, including adults, were obtained from the breeder (B&K Universal, Grimston Aldbrough Hull, United Kingdom). One- and 2-week-old pups were received from the breeder with their mothers and were kept together until the experiment was initiated. Those pups were randomly divided

into two groups without consideration of sex (table 1). (In the previous study, we found no sex difference in response to noxious thermal stimulation or in response to N<sub>2</sub>O at these age groups.<sup>6</sup>) Three- and 4-week-old rats were received without mothers, and only male animals were used for the experiment, as for adults. To estimate more accurately the age of each animal, a growth curve of the body weight was created from 12 pups (7 males and 5 females that were obtained from the timed-pregnant rats that delivered at our facility), and the curve fit was calculated as follows:

$$y = 4.8168 + 0.7439x + 1.9774e^{-2}x^2 + 6.5455e^{-4}x^3 \quad (R^2 = 0.999)$$

where *y* = body weight, and *x* = age by day. The day of birth was defined as 0 days old. The age of each animal was then estimated from the inverted formula (table 1):

$$y = -4.4548 + 1.1298x - 1.3568e^{-2}x^2 + 6.7857e^{-5}x^3,$$

where *y* = age by day, and *x* = body weight. The animals were exposed to either air (control group) or 75% N<sub>2</sub>O–25% O<sub>2</sub> (N<sub>2</sub>O group) for 90 min in an acrylic chamber as described in our previous study.<sup>3</sup>

### Spinal Cord Preparation and Immunohistochemical Analysis of c-Fos

The spinal cord collection and its cryosection and immunohistochemical analysis are described in detail in our previous study.<sup>3</sup> In brief, animals were injected intraperitoneally with sodium pentobarbital (100 mg/kg) immediately after gas exposure, and the spinal cord was collected after paraformaldehyde perfusion. The spinal cord was cryosectioned at 30 μm, and sections were collected in 0.1-M phosphate-buffered saline as free-floating sections. Sections were incubated with anti-c-Fos antibody (1:10000, catalog No. sc-52-G; Santa Cruz Biotechnology, Santa Cruz, CA), and the immunohistochemical reaction was visualized using enhanced diaminobenzidine (DAB) reaction (DAB kit; Vector Laboratories, Burlingame, CA). Slides were examined for c-Fos-positive cells, which were identified by dense black nuclear staining. For adult animals, the number of c-Fos-positive cells was counted for each area of the spinal cord, *i.e.*, laminae I–II (superficial area), laminae III–IV (nucleus proprius area), laminae V–VI (neck area), and laminae VII–X (ventral area), according to the method described by Presley *et al.*<sup>8</sup> For young animals, such a scheme

\* Postdoctoral Fellow, † Ph.D. Student, ‡ Professor, § Senior Lecturer.

Received from the Department of Anaesthetics and Intensive Care, Imperial College of Science, Technology and Medicine, University of London, London, United Kingdom, and the Magill Department of Anaesthesia, Intensive Care and Pain Management, Chelsea and Westminster Hospital, London, United Kingdom. Submitted for publication June 18, 2001. Accepted for publication September 6, 2001. Supported by the *British Journal of Anaesthesia*/Royal Academy of Anaesthetists, London, United Kingdom; the Medical Research Council of the United Kingdom, London, United Kingdom; and Chelsea and Westminster Health Care National Health Service Trust, London, United Kingdom. Presented in part at the annual meeting of American Society of Anesthesiologists, San Francisco, California, October 18, 2000.

Address reprint requests to Dr. Fujinaga: Academic Anaesthesia, Chelsea and Westminster Hospital, 369 Fulham Road, London, SW10 9NH, United Kingdom. Address electronic mail to: m.fujinaga@ic.ac.uk. Individual article reprints may be purchased through the Journal Web site, [www.anesthesiology.org](http://www.anesthesiology.org).

**Table 1. Summary Data from Experimental Groups at Different Developmental Stages**

| Age (weeks) | Group            | No. of Animals Examined | Body Weight (g, Mean $\pm$ SD) | Estimated Age (days, Mean $\pm$ SD) | Sex Ratio (M/F) |
|-------------|------------------|-------------------------|--------------------------------|-------------------------------------|-----------------|
| 1           | Control          | 4                       | 12.7 $\pm$ 0.7                 | 7.9 $\pm$ 0.6                       | 2/2             |
|             | N <sub>2</sub> O | 4                       | 12.9 $\pm$ 0.9                 | 7.9 $\pm$ 0.7                       | 3/1             |
| 2           | Control          | 4                       | 26.2 $\pm$ 1.3                 | 17.0 $\pm$ 0.8                      | 2/2             |
|             | N <sub>2</sub> O | 4                       | 26.0 $\pm$ 0.9                 | 16.9 $\pm$ 0.5                      | 2/2             |
| 3           | Control          | 4                       | 34.4 $\pm$ 5.8                 | 21.0 $\pm$ 2.4                      | 4/0             |
|             | N <sub>2</sub> O | 4                       | 35.1 $\pm$ 5.7                 | 21.3 $\pm$ 2.4                      | 4/0             |
| 4           | Control          | 4                       | 71.3 $\pm$ 6.5                 | 31.7 $\pm$ 1.5                      | 4/0             |
|             | N <sub>2</sub> O | 4                       | 76.4 $\pm$ 4.9                 | 33.0 $\pm$ 1.2                      | 4/0             |

N<sub>2</sub>O = nitrous oxide.

could not be used because of immature development of the spinal cord. Therefore, a simplified scheme developed by Yi and Barr<sup>9</sup> was used to count the number of c-Fos-positive cells in four different areas of the spinal cord, *i.e.*, A-B, C, D, and E. At least four animals were examined for each group, and the number of c-Fos-positive cells in each area and group was calculated as mean  $\pm$  SD. An investigator who conducted the counting of c-Fos-positive cells was blinded for experimental groups.

#### Statistical Analysis

The Mann-Whitney U test was performed on the data for the numbers of c-Fos-positive cells between control and N<sub>2</sub>O groups at each developmental stage. A *P* value less than 0.05 was considered to be statistically significant. No attempt was made to compare among different levels of the spinal cord and different age groups.

## Results

In adult rats, exposure to 75% N<sub>2</sub>O increased the number of c-Fos-positive cells at all levels of the spinal cord examined, *i.e.*, cervical, thoracic, and lumbar levels, and within all laminae except for laminae I and II (table 2). N<sub>2</sub>O-induced c-Fos expression was specifically localized within laminae III and VI. In younger rats, two levels of the spinal cord, cervical and lumbar, were examined, which showed similar results (table 3). (Those at the thoracic and sacral levels were too small to be processed.) In 1-week-old animals, there were no differences in the number of c-Fos-positive cells between control and N<sub>2</sub>O groups, *i.e.*, N<sub>2</sub>O did not induce c-Fos expression. In 2-, 3-, and 4-week-old animals, the number of c-Fos-positive cells was increased in all areas.

## Discussion

Descending inhibitory neurons are essential components of the "endogenous pain-suppression system."<sup>10</sup> Recent studies have indicated that activation of descending noradrenergic inhibitory neurons has a pivotal role in the analgesic-antinociceptive effect of N<sub>2</sub>O.<sup>1</sup> During de-

velopment, descending inhibitory neurons extend their axons *caudad* from the brain stem, reaching the spinal cord during the fetal period.<sup>11</sup> Evidence has shown that these neurons are not functionally mature until a few weeks after birth in rats. For example, immunohistochemical studies have shown that it takes more than 2 weeks after birth for noradrenergic neurons to establish their adult distribution pattern in the dorsal horn of the spinal cord.<sup>12-14</sup> Electrophysiologic studies have also indicated that descending inhibitory neurons become functionally mature approximately 3 weeks after birth.<sup>4,5</sup> In the current study, we have demonstrated that N<sub>2</sub>O does not induce c-Fos expression in the spinal cord in rats until 2 weeks after birth. This result is consistent with our hypothesis that N<sub>2</sub>O does not induce c-Fos expression in the spinal cord of newborn rats because of a lack of functionally mature descending noradrenergic inhibitory neurons. It is also in accordance with our previous study indicating that N<sub>2</sub>O does not induce an antinociceptive response to the tail-flick test in newborn rats.<sup>4</sup>

**Table 2. Number of c-Fos-positive Cells at Different Laminae of the Spinal Cord at Different Levels in Adult Animals**

|                 | Control          | 75% N <sub>2</sub> O |
|-----------------|------------------|----------------------|
| Body weight (g) | 233.0 $\pm$ 26.2 | 235.8 $\pm$ 29.4     |
| Cervical        |                  |                      |
| Laminae I-II    | 5.5 $\pm$ 3.5    | 7.1 $\pm$ 1.7        |
| Laminae III-IV  | 6.1 $\pm$ 0.9    | 42.8 $\pm$ 2.7*      |
| Laminae V-VI    | 1.8 $\pm$ 1.0    | 24.7 $\pm$ 8.7*      |
| Laminae VII-X   | 3.3 $\pm$ 1.7    | 15.3 $\pm$ 3.1*      |
| Total           | 16.8 $\pm$ 4.4   | 89.9 $\pm$ 10.1*     |
| Thoracic        |                  |                      |
| Laminae I-II    | 2.6 $\pm$ 1.2    | 4.3 $\pm$ 2.2        |
| Laminae III-IV  | 5.8 $\pm$ 2.1    | 29.4 $\pm$ 8.7*      |
| Laminae V-VI    | 2.6 $\pm$ 1.1    | 13.9 $\pm$ 6.1*      |
| Laminae VII-X   | 1.7 $\pm$ 1.1    | 6.8 $\pm$ 2.2*       |
| Total           | 12.8 $\pm$ 2.5   | 54.4 $\pm$ 15.8*     |
| Lumbar          |                  |                      |
| Laminae I-II    | 9.8 $\pm$ 5.7    | 12.3 $\pm$ 4.3       |
| Laminae III-IV  | 18.3 $\pm$ 7.6   | 64.8 $\pm$ 8.9*      |
| Laminae V-VI    | 5.3 $\pm$ 1.4    | 27.0 $\pm$ 6.2*      |
| Laminae VII-X   | 3.8 $\pm$ 1.4    | 15.6 $\pm$ 2.6*      |
| Total           | 37.0 $\pm$ 12.8  | 120.0 $\pm$ 4.2*     |

Values are mean  $\pm$  SD; n = 4.

\* *P* < 0.05 versus control.

**Table 3. Number of c-Fos-positive Cells at Different Areas of the Spinal Cord at the Cervical and Lumbar Levels in Newborn Rats of Different Ages**

| Age (weeks) | Area  | Cervical Level |                  | Lumbar Level |                  |
|-------------|-------|----------------|------------------|--------------|------------------|
|             |       | Control        | N <sub>2</sub> O | Control      | N <sub>2</sub> O |
| 1           | A-B   | 11.0 ± 3.2     | 9.8 ± 2.5        | 4.3 ± 1.7    | 3.9 ± 3.3        |
|             | C     | 12.2 ± 9.2     | 7.0 ± 2.5        | 9.3 ± 3.3    | 7.1 ± 4.6        |
|             | D     | 5.2 ± 3.2      | 3.8 ± 1.2        | 1.6 ± 0.9    | 3.3 ± 2.4        |
|             | E     | 6.2 ± 2.7      | 4.8 ± 2.1        | 1.8 ± 1.0    | 1.6 ± 1.3        |
|             | Total | 34.5 ± 11.8    | 25.4 ± 2.8       | 16.9 ± 1.9   | 15.8 ± 8.1       |
| 2           | A-B   | 9.8 ± 3.7      | 33.9 ± 6.1*      | 10.4 ± 5.5   | 22.8 ± 13.3*     |
|             | C     | 24.4 ± 9.4     | 42.3 ± 5.5*      | 5.7 ± 3.9    | 30.7 ± 13.8*     |
|             | D     | 7.8 ± 3.2      | 23.0 ± 5.7*      | 7.9 ± 5.3    | 16.3 ± 10.6      |
|             | E     | 3.4 ± 1.8      | 12.1 ± 3.1*      | 1.1 ± 0.5    | 6.8 ± 4.9*       |
|             | Total | 45.3 ± 9.1     | 111.3 ± 9.6*     | 25.1 ± 14.7  | 76.5 ± 41.6*     |
| 3           | A-B   | 15.2 ± 7.7     | 40.2 ± 7.8*      | 9.2 ± 5.6    | 31.6 ± 11.9*     |
|             | C     | 9.3 ± 6.7      | 29.9 ± 7.6*      | 5.8 ± 3.4    | 35.7 ± 19.9*     |
|             | D     | 3.2 ± 1.7      | 28.7 ± 12.2*     | 1.9 ± 0.6    | 21.3 ± 14.2*     |
|             | E     | 1.7 ± 1.2      | 13.4 ± 2.6*      | 0.8 ± 0.8    | 8.5 ± 5.9*       |
|             | Total | 29.3 ± 13.0    | 112.2 ± 25.7*    | 17.7 ± 9.1   | 97.1 ± 45.0*     |
| 4           | A-B   | 12.9 ± 2.3     | 21.1 ± 4.4*      | 26.0 ± 11.9  | 39.2 ± 5.8*      |
|             | C     | 12.5 ± 5.0     | 45.0 ± 7.0*      | 12.4 ± 5.2   | 23.5 ± 5.4*      |
|             | D     | 3.6 ± 2.0      | 26.9 ± 3.1*      | 2.6 ± 1.5    | 12.8 ± 2.7*      |
|             | E     | 3.4 ± 4.4      | 11.4 ± 4.6*      | 1.8 ± 1.0    | 7.2 ± 1.9*       |
|             | Total | 32.4 ± 8.2     | 104.4 ± 6.6*     | 42.8 ± 18.6  | 82.6 ± 8.9*      |

Values are mean ± SD; n = 4.

\*  $P < 0.05$  versus control.

N<sub>2</sub>O = nitrous oxide.

The quantitative difference in c-Fos expression between adult and young animals may be confounded by the different laminar schemes used. In the laminar scheme that we have adopted for young animals,<sup>9</sup> A-B includes adult laminae that both express (lamina III) and do not express (laminae I and II) c-Fos with N<sub>2</sub>O exposure. In addition, there seems to be a lack of congruity with N<sub>2</sub>O exposure between our current findings (in which c-Fos expression appears at 2 weeks) and our earlier report (in which antinociceptive effect on tail-flick test only appears at 4 weeks<sup>6</sup>). However, these can be reconciled by the fact that although activation (and hence c-Fos expression) of  $\gamma$ -aminobutyric acid-mediated (GABAergic) interneurons is required,<sup>3</sup> it is not sufficient to produce antinociceptive effect with N<sub>2</sub>O exposure. Therefore, other downstream consequences of GABA release may still be immature and nonfunctional, including signaling through the GABA<sub>A</sub> receptor.<sup>15</sup> Furthermore, the sacral elements are involved in the tail-flick latency paradigm, and this region of the spinal cord was not examined in this study for technical reasons.

In summary, we have demonstrated that N<sub>2</sub>O administration induces c-Fos expression in the spinal cord of the adult rat; this expression is deficient in newborn rats and appears only 2 weeks after birth. These findings are consistent with our hypothesis that a lack of functional descending noradrenergic inhibitory neurons precludes

both the induction of c-Fos expression and the antinociceptive effect during N<sub>2</sub>O exposure in newborn rats.

## References

1. Maze M, Fujinaga M: Recent advances in understanding the actions and toxicity of nitrous oxide. *Anaesthesia* 2000; 55:311-4
2. Harris JA: Using c-fos as a neural marker of pain. *Brain Res Bull* 1998; 45:1-8
3. Hashimoto T, Maze M, Ohashi Y, Fujinaga M: Nitrous oxide activates GABAergic neurons in the spinal cord in Fischer rat. *ANESTHESIOLOGY* 2001; 95: 463-9
4. Fitzgerald M, Koltzenburg M: The functional development of descending inhibitory pathways in the dorsolateral funiculus of the newborn rat spinal cord. *Brain Res* 1986; 389:261-70
5. van Praag H, Frenk H: The development of stimulation-produced analgesia (SPA) in the rat. *Dev Brain Res* 1991; 64:71-6
6. Fujinaga M, Doone R, Davies MF, Maze M: Nitrous oxide lacks antinociceptive effect on tail flick test in newborn rats. *Anesth Analg* 2000; 91:6-10
7. Fender C, Fujinaga M, Maze M: Strain differences in antinociceptive effect of nitrous oxide on tail flick test in rats. *Anesth Analg* 2000; 90:195-9
8. Presley RW, Menétrey D, Levine JD, Basbaum AI: Systemic morphine suppresses noxious stimulus-evoked Fos protein-like immunoreactivity in the rat spinal cord. *J Neurosci* 1990; 10:323-35
9. Yi DK, Barr GA: The induction of Fos-like immunoreactivity by noxious thermal, mechanical and chemical stimuli in the lumbar spinal cord of infant rats. *Pain* 1995; 60:257-65
10. Basbaum AL, Fields HL: Endogenous pain control mechanisms: Review and hypothesis. *Ann Neurol* 1978; 4:451-62
11. Leong SK, Shieh JY, Wong WC: Localizing spinal cord projecting neurons in neonatal and immature albino rats. *J Comp Neurol* 1984; 228:18-23
12. Commissiong JW: Development of catecholaminergic nerves in the spinal cord of the rat. *Brain Res* 1983; 264:197-208
13. Aramant RB, Giron LT Jr, Ziegler MG: Postnatal development of dopamine- $\beta$ -hydroxylase-immunoreactive fibers of the spinal cord of the rat. *Dev Brain Res* 1986; 25:161-71
14. Rajaofetra N, Poulat P, Marlier L, Geffard M, Privat A: Pre- and postnatal development of noradrenergic projections to the rat spinal cord: An immunocytochemical study. *Brain Res Dev Brain Res* 1992; 67:237-46
15. Rivera C, Voipio J, Payne JA, Ruusuvuori E, Lahtinen H, Lamsa K, Pirvola U, Saarma M, Kaila K: The K<sup>+</sup>/Cl<sup>-</sup> co-transporter KCC2 renders GABA hyperpolarizing during neuronal maturation. *Nature* 1999; 397:251-5
